# Supplementary material
Source: publisher figshare collection journal article supplement (https://tandf.figshare.com/articles/dataset/_/12173997)
Supplement: Supplementary file 1 [file 2]

Archive with 2 entries (2 files):
- IISE-Supplement.pdf
- IISE-Supplement.tex
