# Supplementary material
Source: publisher figshare collection journal article supplement (https://tandf.figshare.com/articles/dataset/_/12173997)
Supplement: Supplementary file 1 [file 2 › IISE-Supplement.pdf]

# Online Supplement for

## Online Contextual Learning with Perishable Resources Allocation

Xin Pan, Jie Song, Jingtong Zhao, Van-Anh Truong

### A Proof for Lemma 1

*Proof.* Fix any realization of demand represented as a sequence  $\mathbb{D} = \{(i_d, t_d), D\}$  ( $d = 1, 2, \dots, D$ ) where  $i_d$  and  $t_d$  are the customer type and arrival time of the  $d$ -th arrival, respectively, and  $D$  is a random variable representing the total number of arrivals. Let  $p_{ijk}(t_d) \in [0, 1]$  be the assignment probability of resource  $(j, k)$  to the  $d$ -th arrival. Note that the optimal offline decisions must satisfy

$$\begin{aligned} \sum_{d=1}^D p_{ijk}(t_d) &\leq c_j \quad j = 1, 2, \dots, J; k = 1, 2, \dots, K, \\ \sum_{j=1}^J \sum_{k=1}^K p_{ijk}(t_d) &\leq \mathbb{1}_{i_d=i}, d = 1, 2, \dots, D, i = 1, 2, \dots, I \\ p_{ijk}(t_d) &= 0, \quad \forall t_d = [0, s_{jk} - W) \cup (s_{jk}, T]. \end{aligned}$$

Since the inequalities hold for any realization  $\{(i_d, t_d)\}$  ( $d = 1, 2, \dots, D$ ), then it is obvious that the constraints will also be true after taking expectations on both sides. Therefore, the expected optimal offline solution is feasible in problem (1), so that  $V^{OFF} \geq V^*$ .  $\square$

## B Proofs for Section 4

### B.1 Proof for Lemma 2

*Proof.* For the first part, because  $\mathbf{r}_\tau = \mathbf{Z}_\tau \boldsymbol{\beta} + \boldsymbol{\epsilon}$ , we have

$$\begin{aligned}\hat{\boldsymbol{\beta}} &= (\mathbf{Z}_\tau^\top \mathbf{Z}_\tau)^{-1} \mathbf{Z}_\tau^\top \mathbf{r}_\tau \\ &= (\mathbf{Z}_\tau^\top \mathbf{Z}_\tau)^{-1} \mathbf{Z}_\tau^\top (\mathbf{Z}_\tau \boldsymbol{\beta} + \boldsymbol{\epsilon}) \\ &= \boldsymbol{\beta} + (\mathbf{Z}_\tau^\top \mathbf{Z}_\tau)^{-1} \mathbf{Z}_\tau^\top \boldsymbol{\epsilon}.\end{aligned}$$

Hence  $E[\hat{\boldsymbol{\beta}}] = \boldsymbol{\beta}$ , and

$$\begin{aligned}\text{Var}(\hat{\boldsymbol{\beta}}) &= E[(\hat{\boldsymbol{\beta}} - \boldsymbol{\beta})(\hat{\boldsymbol{\beta}} - \boldsymbol{\beta})^\top] \\ &= E[(\mathbf{Z}_\tau^\top \mathbf{Z}_\tau)^{-1} \mathbf{Z}_\tau^\top \boldsymbol{\epsilon} (\mathbf{Z}_\tau^\top \mathbf{Z}_\tau)^{-1} \mathbf{Z}_\tau^\top \boldsymbol{\epsilon}^\top] \\ &= (\mathbf{Z}_\tau^\top \mathbf{Z}_\tau)^{-1} \mathbf{Z}_\tau^\top E[\boldsymbol{\epsilon} \boldsymbol{\epsilon}^\top] \mathbf{Z}_\tau (\mathbf{Z}_\tau^\top \mathbf{Z}_\tau)^{-1} \\ &= \sigma^2 (\mathbf{Z}_\tau^\top \mathbf{Z}_\tau)^{-1}.\end{aligned}$$

The second part follows immediately from the first part. □

### B.2 Proof for Lemma 3

*Proof.* According to Lemma 2,  $\mathbf{z}\hat{\boldsymbol{\beta}}$  follows the normal distribution, and the variance is known.

So we can construct a confidence interval around  $\mathbf{z}\hat{\boldsymbol{\beta}}$

$$\mathbf{z}\hat{\boldsymbol{\beta}} \pm \mathbf{z} \frac{\sigma \sqrt{\mathbf{z}^\top (\mathbf{Z}_\tau^\top \mathbf{Z}_\tau)^{-1} \mathbf{z}}}{\sqrt{\tau}} \quad (1)$$

with confidence level  $1 - \alpha$ , where  $\mathbf{z} \frac{\alpha}{2}$  is the standard normal distribution coefficient.

Next we show how the width of confidence interval changes with the scaling parameter. As a property of eigenvalues, we have

$$\mathbf{z}^\top (\mathbf{Z}_\tau^\top \mathbf{Z}_\tau)^{-1} \mathbf{z} \leq \lambda_{\max} \mathbf{z}^\top \mathbf{z} \leq \text{tr}((\mathbf{Z}_\tau^\top \mathbf{Z}_\tau)^{-1}) \mathbf{z}^\top \mathbf{z}, \quad (2)$$

where  $\lambda_{\max}$  is the maximum eigenvalue of  $(\mathbf{Z}_\tau^\top \mathbf{Z}_\tau)^{-1}$ . By the Sherman-Morrison formula, after

adding one more sample  $\mathbf{z}'$  into  $\mathbf{Z}_\tau$ , the trace of the inverse matrix  $(\mathbf{Z}^\top \mathbf{Z})_\tau^{-1}$  becomes

$$\begin{aligned} \text{tr}((\mathbf{Z}_{\tau+1}^\top \mathbf{Z}_{\tau+1})^{-1}) &= \text{tr}((\mathbf{Z}_\tau^\top \mathbf{Z}_\tau)^{-1}) - \frac{\text{tr}((\mathbf{Z}_\tau^\top \mathbf{Z}_\tau)^{-1} \mathbf{z}' \mathbf{z}'^\top (\mathbf{Z}_\tau^\top \mathbf{Z}_\tau)^{-1})}{1 + \mathbf{z}'^\top (\mathbf{Z}_\tau^\top \mathbf{Z}_\tau)^{-1} \mathbf{z}'} \\ &\leq \text{tr}((\mathbf{Z}_\tau^\top \mathbf{Z}_\tau)^{-1}) - \frac{\text{tr}((\mathbf{Z}_\tau^\top \mathbf{Z}_\tau)^{-1} \mathbf{z}' \mathbf{z}'^\top (\mathbf{Z}_\tau^\top \mathbf{Z}_\tau)^{-1})}{1 + \text{tr}((\mathbf{Z}_\tau^\top \mathbf{Z}_\tau)^{-1}) \mathbf{z}'^\top \mathbf{z}'} \\ &\leq \text{tr}((\mathbf{Z}_\tau^\top \mathbf{Z}_\tau)^{-1}) - \frac{\text{tr}(\mathbf{z}' \mathbf{z}'^\top)}{\text{tr}^2(\mathbf{Z}_\tau^\top \mathbf{Z}_\tau)(1 + \text{tr}((\mathbf{Z}_\tau^\top \mathbf{Z}_\tau)^{-1}) \mathbf{z}'^\top \mathbf{z}')}, \end{aligned} \quad (3)$$

where the first inequality follows (2), and the second inequality follows from  $\text{tr}(AB) \leq \text{tr}(A)\text{tr}(B)$  so that  $\text{tr}(\mathbf{z}' \mathbf{z}'^\top) = \text{tr}((\mathbf{Z}_\tau^\top \mathbf{Z}_\tau)(\mathbf{Z}_\tau^\top \mathbf{Z}_\tau)^{-1} \mathbf{z}' \mathbf{z}'^\top (\mathbf{Z}_\tau^\top \mathbf{Z}_\tau)^{-1} (\mathbf{Z}_\tau^\top \mathbf{Z}_\tau)) \leq \text{tr}(\mathbf{Z}_\tau^\top \mathbf{Z}_\tau) \text{tr}((\mathbf{Z}_\tau^\top \mathbf{Z}_\tau)^{-1} \mathbf{z}' \mathbf{z}'^\top (\mathbf{Z}_\tau^\top \mathbf{Z}_\tau)^{-1}) \text{tr}(\mathbf{Z}_\tau^\top \mathbf{Z}_\tau)$ . Suppose  $a \leq \mathbf{z}'^\top \mathbf{z}' \leq b$  for all possible  $\mathbf{z}'$ , then it is obvious that  $\tau a \leq \text{tr}((\mathbf{Z}_\tau^\top \mathbf{Z}_\tau)) \leq \tau b$ . Let  $x_\tau = \text{tr}((\mathbf{Z}_\tau^\top \mathbf{Z}_\tau)^{-1})$ , then (3) becomes

$$x_\tau \leq x_{\tau-1} - \frac{a}{(\tau-1)^2 b^2 (1 + b x_{\tau-1})}. \quad (4)$$

We suppose that  $\tau \in [\tau_0, \infty)$  where  $\tau = \tau_0$  is the first time that the sample matrix  $\mathbf{Z}$  becomes a full rank matrix. It is obvious that sequence  $[x_\tau]$  is decreasing, so that  $x_\tau \leq x_{\tau_0}$  for all  $\tau \in [\tau_0, \infty)$ . Then  $\mathbf{z}_{\frac{\alpha}{2}}^\top \frac{\sigma \sqrt{\mathbf{z}^\top (\mathbf{Z}^\top \mathbf{Z})^{-1} \mathbf{z}}}{\sqrt{\tau}} \leq \frac{\eta_1}{\sqrt{\tau}}$  where  $\eta_1 = \mathbf{z}_{\frac{\alpha}{2}}^\top \sigma \sqrt{x_{\tau_0} b}$ , so that

$$P\{\|r - \tilde{r}\|_\infty \leq \frac{\eta_1}{\sqrt{\tau}}\} \geq 1 - \alpha. \quad (5)$$

□

### B.3 Proof for Lemma 4

*Proof.* From Chebyshev's inequality, we have

$$P\left(|\tau - E[\tau]| \geq \sqrt{\frac{\text{Var}[\tau]}{\delta_\tau}}\right) \leq \delta_\tau.$$

So

$$P(\tau \leq E[\tau] - \sqrt{\frac{\text{Var}[\tau]}{\delta_\tau}}) \leq P(|\tau - E[\tau]| \geq \sqrt{\frac{\text{Var}[\tau]}{\delta_\tau}}) \leq \delta_\tau.$$

Let  $\tau_{jk}$  be the number of all customer types admitted to the  $k$ th resource of type  $j$  under the exploration subroutine. Then  $E[\tau] = K_0 \sum_{j=1}^N E[\tau_{jk}]$  considering recurrent arrivals.  $\tau_{jk}$  is a truncated Poisson random variable with rate  $\lambda_j = \sum_{i=1}^M D_{ij}$ , and it cannot exceed the resource

capacity  $c_j$ . Therefore,

$$\begin{aligned}
E[\tau_{jk}] &= \sum_{l=1}^{c_j} l \frac{\lambda_j^l e^{-\lambda_j}}{l!} + \sum_{l=c_j+1}^{\infty} c_j \frac{\lambda_j^l e^{-\lambda_j}}{l!} \\
&= \lambda_j \sum_{l=1}^{c_j} \frac{\lambda_j^{l-1} e^{-\lambda_j}}{(l-1)!} + \sum_{l=c_j+1}^{\infty} c_j \frac{\lambda_j^l e^{-\lambda_j}}{l!} \\
&\geq \lambda_j \sum_{l=0}^{c_j-1} \frac{\lambda_j^l e^{-\lambda_j}}{l!} \\
&= \lambda_j P(\text{Poisson}(\lambda_j) < c_j) \\
&= \lambda_j (1 - P(\text{Poisson}(\lambda_j) \geq c_j)) \\
&\geq \lambda_j (1 - \frac{\lambda_j}{c_j}),
\end{aligned}$$

where we have used the Markov inequality in the last step. Hence,  $E[\tau] \geq K_0 \sum_{j=1}^N \lambda_j (1 - \frac{\lambda_j}{c_j})$ .

Since  $\tau$  is the sum of those truncated Poisson random variables, its variance is smaller than that of the sum of those un-truncated Poisson random variables. So  $\text{Var}[\tau] \leq K_0 \sum_{j=1}^N \lambda_j$ . Let  $\mu = K_0 \sum_{j=1}^N \sum_{i=1}^M D_{ij} (1 - \frac{\sum_{i=1}^M D_{ij}}{c_j}) - \sqrt{\frac{K_0 \sum_{j=1}^N \sum_{i=1}^M D_{ij}}{\delta_\tau}} \leq E[\tau] - \sqrt{\frac{\text{Var}[\tau]}{\delta_\tau}}$ . Then  $P(\tau \leq \mu) \leq P(\tau \leq E[\tau] - \sqrt{\frac{\text{Var}[\tau]}{\delta_\tau}}) \leq \delta_\tau$ .  $\square$

#### B.4 Proof for Theorem 1

*Proof.* Let  $F_{MN+1}$  denote the event that the observation matrix  $\mathbf{Z}$  has full rank  $M \times N + 1$ . Then by Lemma 3 and Lemma 4 we have

$$\begin{aligned}
P\{\|r - \tilde{r}\|_\infty \geq \frac{\eta_1}{\sqrt{\mu}} | \tau, F_{MN+1}\} &= P\{\|r - \tilde{r}\|_\infty \geq \frac{\eta_1}{\sqrt{\mu}} | \tau \geq \mu, F_{MN+1}\} P(\tau \geq \mu) \\
&\quad + P\{\|r - \tilde{r}\|_\infty \geq \frac{\eta_1}{\sqrt{\mu}} | \tau \leq \mu, F_{MN+1}\} P(\tau \leq \mu) \\
&\leq P\{\|r - \tilde{r}\|_\infty \geq \frac{\eta_1}{\sqrt{\mu}} | \tau \geq \mu, F_{MN+1}\} + P(\tau \leq \mu) \\
&\leq \alpha + \delta_\tau.
\end{aligned}$$

$\square$

### B.5 Proof for Lemma 5

*Proof.* Note that  $1 - x \leq e^{-x}$  for  $0 \leq x \leq 1$ , therefore

$$1 - \frac{d_{ij}^*}{c_j e} \leq e^{-\frac{d_{ij}^*}{c_j e}}. \quad (6)$$

Thus  $(1 - \frac{d_{ij}^*}{c_j e})^{K'_0 c_j} \leq e^{-\frac{d_{ij}^* K'_0}{e}}$ , and

$$P(F_{MN+1}) \geq \Pi_{j=1}^N (1 - \sum_{i=1}^M [(1 - \frac{d_{ij}^*}{c_j e})^{K'_0 c_j}]) p_{delay} \quad (7)$$

$$\geq \Pi_{j=1}^N (1 - \sum_{i=1}^M e^{-\frac{d_{ij}^* K'_0}{e}}) p_{delay} \quad (8)$$

For an exploration phase of length  $K_0 \geq -\frac{e}{\min_{i,j} d_{ij}^*} \ln \frac{1 - (\frac{p_f}{p_{delay}})^{\frac{1}{N}}}{M} - \frac{\log(1-p_{delay})}{D_L}$ , we have

$$\begin{aligned} P(F_{MN+1}) &\geq \Pi_{j=1}^N (1 - \sum_{i=1}^M e^{\frac{d_{ij}^*}{\min_{i,j} d_{ij}^*} \ln \frac{1 - (\frac{p_f}{p_{delay}})^{\frac{1}{N}}}{M}}) p_{delay} \\ &\geq \Pi_{j=1}^N (1 - \sum_{i=1}^M \frac{1 - (\frac{p_f}{p_{delay}})^{\frac{1}{N}}}{M}) p_{delay} \\ &= p_f. \end{aligned}$$

□

### B.6 Proof for Theorem 2

*Proof.* From Theorem 1, we get:

$$\begin{aligned}
P\{\|r - \tilde{r}\|_\infty \geq \frac{\eta_1}{\sqrt{\mu}}\} &= P\{\|r - \tilde{r}\|_\infty \geq \frac{\eta_1}{\sqrt{\mu}} | F_{MN+1}\} P(F_{MN+1}) + \\
&\quad P\{\|r - \tilde{r}\|_\infty \geq \frac{\eta_1}{\sqrt{\mu}} | \bar{F}_{MN+1}\} P(\bar{F}_{MN+1}) \\
&\leq P\{\|r - \tilde{r}\|_\infty \geq \frac{\eta_1}{\sqrt{\mu}} | F_{MN+1}\} P(F_{MN+1}) + P(\bar{F}_{MN+1}) \\
&= P\{\|r - \tilde{r}\|_\infty \geq \frac{\eta_1}{\sqrt{\mu}} | F_{MN+1}\} P(F_{MN+1}) + 1 - P(F_{MN+1}) \\
&= (P\{\|r - \tilde{r}\|_\infty \geq \frac{\eta_1}{\sqrt{\mu}} | F_{MN+1}\} - 1) P(F_{MN+1}) + 1 \\
&\leq (P\{\|r - \tilde{r}\|_\infty \geq \frac{\eta_1}{\sqrt{\mu}} | F_{MN+1}\} - 1) p_f + 1 \\
&\leq (\alpha + \delta_\tau - 1) p_f + 1
\end{aligned}$$

□

## C Proofs for Section 6

### C.1 Proof for lemma 6

*Proof.* We obtain the total regret by summing up the regret in the exploration phase and that in the exploitation phase as follows

$$Reg^{TP} = Reg^{TP}(0, T_0) + Reg^{TP}(T_0, T). \quad (9)$$

The first term is the regret incurred in the exploration phase, and it is smaller than  $K_0 \|c\|_1$  since each single resource can only incur regret at most 1. Along with regret of exploitation phase, we have

$$\begin{aligned}
Reg^{TP}(0, T) &\leq K_0 \|c\|_1 + \frac{3}{2} (K - K_0) \|c\|_1 \eta_1 (\eta_2 K_0 - \eta_3 \sqrt{K_0})^{-0.5} \\
&\leq K_0 \|c\|_1 + \frac{3}{2} (K - K_0) \|c\|_1 \eta_1 (\eta_2 - \eta_3)^{-0.5} K_0^{-0.5}
\end{aligned}$$

□

## C.2 Proof for Lemma 7

*Proof.* According to the expression  $Reg(K_0) = K_0\|c\|_1 + \eta_4\|c\|_1(K - K_0)K_0^{-0.5}$ , we have

$$\frac{\partial Reg(K_0)}{\partial K_0} = a_1 - a_2K_0^{-1.5} + a_3K_0^{-0.5}, \quad (10)$$

where  $a_1 = \|c\|_1$ ,  $a_2 = 0.5\|c\|_1\eta_4K$ , and  $a_3 = -0.5\|c\|_1\eta_4$ . Therefore, to find the root of the above equation, we have to solve a cubic polynomial

$$a_1x^3 + a_3x^2 - a_2 = 0, \quad (11)$$

where  $x = K_0^{0.5}$ . Since the discriminant of the equation  $\Delta = -4a_3^3(-a_2) - 27a_1^2a_2^2 < 0$ , the equation has only one real root and two conjugate non-real roots.

To solve the cubic polynomial, we transform the equation into another standard form

$$x^3 + px + q = 0, \quad (12)$$

where  $p = \frac{-a_3^2}{3a_1^2}$  and  $q = \frac{-27a_1^2a_2+2a_3^3}{27a_1^3}$ . Note that  $\frac{\partial(a_1x^3+a_3x^2-a_2)}{\partial x} = 3a_1x^2 + 2a_3x > 0$  for  $x \geq 0$ , because when  $K$  is a large number there are  $a_1 > 0 > a_3$  and  $|a_1| \gg |a_3|$ . So there is only one solution for (11) when  $x > 0$ , which is

$$x = \sqrt[3]{-\frac{q}{2} + \sqrt{\frac{q^2}{4} + \frac{p^3}{27}}} + \sqrt[3]{-\frac{q}{2} - \sqrt{\frac{q^2}{4} + \frac{p^3}{27}}}. \quad (13)$$

Since  $p = O(1)$  and  $q = O(K)$ , when  $K$  is a large number we have  $|q| \gg |p|$ . Hence, we have an approximate form of the solution, namely  $x = \sqrt[3]{-q} = \sqrt[3]{\frac{27a_1^2a_2-2a_3^3}{27a_1^3}}$ . Furthermore, we have

$$K_0^* = x^2 \approx \left(\frac{a_2}{a_1}\right)^{\frac{2}{3}} = (0.5\eta_4K)^{\frac{2}{3}}. \quad (14)$$

□

## D Proof for Theorem 4

*Proof.* According to Theorem 2, with the current available data  $\mu_0^{\omega-1}$ , if an exploration phase  $K_0^\omega$  is selected, the estimation error will be

$$\|r - \tilde{r}\|_\infty \leq \frac{\eta_1}{\sqrt{\mu^\omega + \mu_0^{\omega-1}}} = \eta_1(\eta_2 K_0^\omega - \eta_3 \sqrt{K_0^\omega} + \mu_0^{\omega-1})^{-0.5} \leq \eta_1((\eta_2 - \eta_3)K_0^\omega + \mu_0^{\omega-1})^{-0.5}, \quad (15)$$

where  $\mu^\omega = \eta_2 K_0^\omega - \eta_3 \sqrt{K_0^\omega}$ . So we can again proceed as before and now we have

$$Reg^\omega(K_0^\omega) = K_0^\omega \|c\|_1 + \|c\|_1 \eta_4 (K - K_0^\omega)(K_0^\omega + \frac{\mu_0^{\omega-1}}{\eta_2 - \eta_3})^{-0.5},$$

where  $\eta_4 = \frac{3}{2}\eta_1(\eta_2 - \eta_3)^{-0.5}$ . In the following let  $X_0^{\omega-1} = \frac{\mu_0^{\omega-1}}{\eta_2 - \eta_3}$ . So  $X_0^{\omega-1}$  is the total number of previous data in terms of the number of cycles.

According to the expression of  $Reg^\omega(K_0^\omega)$ , we have

$$\frac{\partial Reg^\omega(K_0^\omega)}{\partial K_0^\omega} = a_1 - a_2(K_0^\omega + X_0^{\omega-1})^{-1.5} + a_3(K_0^\omega + X_0^{\omega-1})^{-0.5}, \quad (16)$$

where  $a_1 = \|c\|_1$ ,  $a_2 = 0.5\|c\|_1\eta_4(K + X_0^{\omega-1})$ , and  $a_3 = -0.5\|c\|_1\eta_4$ . Therefore, to find the root of the above equation, we have to solve a cubic polynomial

$$a_1 x^3 + a_3 x^2 - a_2 = 0, \quad (17)$$

where  $x = (K_0^\omega + X_0^{\omega-1})^{0.5}$ . Since the discriminant of the equation  $\Delta = -4a_3^3(-a_2) - 27a_1^2a_2^2 < 0$ , the equation has only one real roots.

To solve the cubic polynomial, we transform the equation into another standard form

$$x^3 + px + q = 0, \quad (18)$$

where  $p = \frac{-a_3^2}{3a_1^2}$  and  $q = \frac{-27a_1^2a_2 + 2a_3^3}{27a_1^3}$ . The solution is

$$x = \sqrt[3]{-\frac{q}{2} + \sqrt{\frac{q^2}{4} + \frac{p^3}{27}}} + \sqrt[3]{-\frac{q}{2} - \sqrt{\frac{q^2}{4} + \frac{p^3}{27}}}. \quad (19)$$

Since  $p = O(1)$  and  $q = -O(X_0^{\omega-1})$ , when  $X_0^{\omega-1} \rightarrow \infty$  we have  $|q| \gg |p|$ . Hence, we have an approximate form of the solution, namely  $x \approx \sqrt[3]{-q} = \sqrt[3]{\frac{27a_1^2a_2 - 2a_3^3}{27a_1^3}}$ . Furthermore, since

$a_1 = O(1)$ ,  $a_2 = O(X_0^{\omega-1})$  and  $a_3 = O(1)$ , when  $X_0^{\omega-1} \rightarrow \infty$ , we have

$$K_0^\omega = x^2 - X_0^{\omega-1} \approx \left(\frac{a_2}{a_1}\right)^{\frac{2}{3}} - X_0^{\omega-1} = \left(\frac{\eta_4(K + X_0^{\omega-1})}{2}\right)^{\frac{2}{3}} - X_0^{\omega-1}. \quad (20)$$

Inserting  $K_0^\omega$  into the regret bound and considering  $K \rightarrow \infty$ , we have

$$Reg^\omega = O\left([\eta_4(K + X_0^{\omega-1})]^{\frac{2}{3}} \|c\|_1 - X_0^{\omega-1} \|c\|_1\right). \quad (21)$$

It is clear that within each epoch, the regret  $Reg^\omega$  has the same order as the exploration length  $K_0^\omega$ , i.e.,  $Reg^\omega = O(K_0^\omega)$ . Let  $Reg^{MP} = \sum_{\omega=1}^{\Omega} Reg^\omega$ . Then  $Reg^{MP} = O(X_0^\Omega)$ , for  $X_0^\Omega = \sum_{\omega=1}^{\Omega} K_0^\omega$ . Note that  $X_0^{\omega-1}$  is increasing with  $\omega$  according to the definition, and when  $X_0^{\omega-1}$  is large enough,  $K_0^\omega$  goes to 0. This implies that  $X_0^{\omega-1}$  will converge. Note that  $X_0^1 = O(K^{\frac{2}{3}})$ , and it also implies that  $X_0^{\omega-1} = O(K^{\frac{2}{3}})$  for all  $\omega = 3, \dots, \Omega + 1$  since if  $X_0^{\omega-1}$  exceeds  $O(K^{\frac{2}{3}})$ ,  $K_0^\omega$  would become negative when  $K \rightarrow \infty$ . Therefore, when  $K \rightarrow \infty$ , we have  $Reg^{MP} = O(X_0^\Omega) = O(K^{\frac{2}{3}})$ . Let  $K_{total} = \Omega K$  be the total number of cycles for all horizons, then we have  $Reg^{MP} = O(K_{total}^{\frac{2}{3}})$ .  $\square$

## E Table of average regret of t-test

Table 1: Summary of average regret and results of t-test.

| $K$ | Mean of average regret |                |                   | Std of average regret |                |                   | Confidence interval width |                |                   | T-test result  |                   |
|-----|------------------------|----------------|-------------------|-----------------------|----------------|-------------------|---------------------------|----------------|-------------------|----------------|-------------------|
|     | TP                     | Greedy<br>exp. | $\epsilon$ Greedy | TP                    | Greedy<br>exp. | $\epsilon$ Greedy | TP                        | Greedy<br>exp. | $\epsilon$ Greedy | Greedy<br>exp. | $\epsilon$ Greedy |
| 5   | 68.2                   | 83.0           | 73.2              | 33.4                  | 18.1           | 11.4              | 12.0                      | 6.5            | 4.1               | 0.72           | 0.78              |
| 10  | 64.0                   | 88.0           | 75.0              | 32.5                  | 24.6           | 7.8               | 11.6                      | 8.8            | 2.8               | 1.48           | 1.80              |
| 15  | 63.3                   | 84.0           | 79.3              | 6.4                   | 14.1           | 5.2               | 2.3                       | 5.0            | 1.9               | 5.67           | 10.65             |
| 20  | 61.5                   | 84.5           | 76.0              | 7.1                   | 13.0           | 5.4               | 2.5                       | 4.7            | 1.9               | 5.37           | 8.94              |
| 25  | 62.4                   | 82.4           | 73.6              | 6.7                   | 7.0            | 5.2               | 2.4                       | 2.5            | 1.9               | 6.34           | 7.23              |
| 30  | 62.7                   | 80.3           | 74.7              | 5.5                   | 6.3            | 6.1               | 2.0                       | 2.3            | 2.2               | 7.84           | 7.98              |
| 35  | 63.1                   | 80.6           | 74.6              | 6.1                   | 6.1            | 5.3               | 2.2                       | 2.2            | 1.9               | 7.27           | 7.79              |
| 40  | 62.8                   | 79.0           | 73.3              | 6.5                   | 5.3            | 5.2               | 2.3                       | 1.9            | 1.9               | 6.84           | 6.90              |
| 45  | 63.8                   | 79.8           | 73.8              | 5.6                   | 6.4            | 4.3               | 2.0                       | 2.3            | 1.5               | 6.48           | 7.80              |
| 50  | 62.0                   | 79.0           | 72.8              | 6.1                   | 6.3            | 5.0               | 2.2                       | 2.3            | 1.8               | 6.77           | 7.52              |
| 55  | 61.8                   | 77.5           | 72.9              | 6.2                   | 5.6            | 4.7               | 2.2                       | 2.0            | 1.7               | 7.27           | 7.84              |
| 60  | 63.0                   | 78.3           | 73.7              | 6.0                   | 5.1            | 4.3               | 2.1                       | 1.8            | 1.5               | 7.41           | 7.93              |
| 65  | 61.5                   | 77.7           | 72.5              | 5.4                   | 5.8            | 4.4               | 1.9                       | 2.1            | 1.6               | 7.55           | 8.53              |
| 70  | 61.4                   | 78.6           | 72.9              | 6.0                   | 4.6            | 3.8               | 2.1                       | 1.6            | 1.4               | 8.32           | 8.84              |
| 75  | 61.3                   | 77.3           | 72.0              | 6.0                   | 3.0            | 4.0               | 2.2                       | 1.1            | 1.4               | 8.71           | 8.11              |
| 80  | 62.5                   | 77.5           | 72.5              | 5.5                   | 3.5            | 4.7               | 2.0                       | 1.2            | 1.7               | 8.46           | 7.63              |
| 85  | 62.4                   | 77.6           | 71.8              | 5.7                   | 4.4            | 4.9               | 2.0                       | 1.6            | 1.8               | 7.13           | 6.82              |
| 90  | 61.1                   | 76.7           | 72.2              | 5.4                   | 4.4            | 4.2               | 1.9                       | 1.6            | 1.5               | 8.78           | 8.88              |
| 95  | 62.1                   | 77.9           | 72.6              | 6.0                   | 5.3            | 4.2               | 2.1                       | 1.9            | 1.5               | 7.20           | 7.86              |
| 100 | 61.0                   | 77.0           | 72.0              | 6.2                   | 2.8            | 3.7               | 2.2                       | 1.0            | 1.3               | 8.86           | 8.38              |
| 105 | 61.0                   | 77.1           | 72.4              | 6.0                   | 3.4            | 4.4               | 2.1                       | 1.2            | 1.6               | 9.07           | 8.44              |
| 110 | 61.8                   | 78.2           | 72.7              | 5.4                   | 4.8            | 4.1               | 1.9                       | 1.7            | 1.5               | 8.29           | 8.84              |
| 115 | 60.9                   | 77.4           | 72.2              | 5.9                   | 5.6            | 3.0               | 2.1                       | 2.0            | 1.1               | 7.64           | 9.42              |
| 120 | 61.7                   | 77.5           | 71.7              | 5.9                   | 4.6            | 3.3               | 2.1                       | 1.6            | 1.2               | 7.30           | 8.06              |
| 125 | 60.8                   | 76.8           | 71.2              | 5.5                   | 2.2            | 3.3               | 2.0                       | 0.8            | 1.2               | 9.68           | 8.95              |
| 130 | 61.5                   | 77.7           | 72.3              | 5.7                   | 3.7            | 2.8               | 2.1                       | 1.3            | 1.0               | 8.62           | 9.23              |
| 135 | 61.5                   | 77.0           | 71.9              | 5.6                   | 3.9            | 2.5               | 2.0                       | 1.4            | 0.9               | 8.31           | 9.19              |
| 140 | 61.4                   | 77.1           | 72.1              | 5.8                   | 4.8            | 4.2               | 2.1                       | 1.7            | 1.5               | 7.83           | 8.19              |
| 145 | 61.4                   | 77.2           | 72.4              | 5.5                   | 4.0            | 2.2               | 2.0                       | 1.4            | 0.8               | 8.85           | 10.14             |
| 150 | 61.3                   | 77.3           | 72.0              | 5.7                   | 4.1            | 3.3               | 2.0                       | 1.5            | 1.2               | 8.39           | 8.92              |
| 155 | 61.3                   | 76.8           | 71.6              | 5.7                   | 3.5            | 4.0               | 2.0                       | 1.3            | 1.4               | 8.40           | 8.11              |
| 160 | 61.9                   | 77.5           | 72.5              | 5.7                   | 2.7            | 2.8               | 2.1                       | 1.0            | 1.0               | 9.17           | 9.09              |
| 165 | 61.2                   | 77.0           | 72.1              | 5.8                   | 3.6            | 3.0               | 2.1                       | 1.3            | 1.1               | 8.73           | 9.17              |
| 170 | 61.2                   | 77.1           | 71.8              | 5.9                   | 2.9            | 3.4               | 2.1                       | 1.0            | 1.2               | 8.89           | 8.53              |
| 175 | 60.6                   | 76.6           | 71.4              | 5.9                   | 2.7            | 3.8               | 2.1                       | 1.0            | 1.3               | 9.11           | 8.46              |
| 180 | 61.1                   | 77.2           | 72.2              | 5.9                   | 3.6            | 2.4               | 2.1                       | 1.3            | 0.9               | 8.73           | 9.49              |
| 185 | 61.1                   | 76.8           | 71.9              | 6.3                   | 3.7            | 2.2               | 2.3                       | 1.3            | 0.8               | 8.09           | 8.84              |
| 190 | 60.5                   | 76.8           | 71.6              | 5.7                   | 2.3            | 2.1               | 2.0                       | 0.8            | 0.8               | 9.85           | 9.98              |
| 195 | 61.5                   | 77.4           | 72.3              | 5.4                   | 3.4            | 2.0               | 1.9                       | 1.2            | 0.7               | 9.25           | 10.28             |
| 200 | 61.5                   | 77.0           | 72.0              | 5.5                   | 3.5            | 2.5               | 2.0                       | 1.3            | 0.9               | 8.79           | 9.52              |
| 205 | 61.0                   | 77.1           | 71.7              | 5.7                   | 3.3            | 2.3               | 2.0                       | 1.2            | 0.8               | 8.98           | 9.61              |
| 210 | 61.4                   | 77.1           | 72.4              | 5.3                   | 3.5            | 1.9               | 1.9                       | 1.3            | 0.7               | 9.46           | 10.70             |
| 215 | 61.4                   | 77.2           | 72.1              | 5.4                   | 4.4            | 2.1               | 1.9                       | 1.6            | 0.7               | 8.37           | 10.06             |
| 220 | 60.9                   | 76.8           | 71.8              | 5.8                   | 2.3            | 1.1               | 2.1                       | 0.8            | 0.4               | 9.54           | 10.08             |
| 225 | 60.9                   | 76.9           | 71.6              | 5.8                   | 4.0            | 2.1               | 2.1                       | 1.4            | 0.8               | 8.33           | 9.48              |
| 230 | 61.3                   | 77.4           | 72.2              | 5.7                   | 3.7            | 1.6               | 2.0                       | 1.3            | 0.6               | 8.83           | 10.13             |
| 235 | 61.3                   | 77.0           | 71.9              | 5.3                   | 3.0            | 1.7               | 1.9                       | 1.1            | 0.6               | 9.60           | 10.53             |
| 240 | 61.3                   | 77.1           | 71.7              | 5.5                   | 0.8            | 1.1               | 2.0                       | 0.3            | 0.4               | 10.19          | 10.12             |
| 245 | 61.2                   | 77.1           | 72.2              | 5.4                   | 2.8            | 1.6               | 1.9                       | 1.0            | 0.6               | 9.89           | 10.66             |
| 250 | 61.2                   | 77.2           | 72.0              | 5.4                   | 3.3            | 1.9               | 1.9                       | 1.2            | 0.7               | 9.37           | 10.35             |
