# Supplementary material
Source: publisher figshare collection journal article supplement (https://tandf.figshare.com/articles/dataset/_/12173997)
Supplement: Supplementary file 1 [file 2 › IISE-Supplement.tex]

\documentclass[11pt]{article}
%\usepackage[utf8]{inputenc}
\usepackage{geometry}
\usepackage{authblk}
\usepackage{amssymb}             %数学公式
\usepackage{amsfonts}            %数学字体
\usepackage{mathrsfs}            %数学花体
\usepackage{amsmath}
\usepackage{amsthm}
\usepackage{algorithm}
\usepackage{algorithmic}
\usepackage{graphicx}
\usepackage{booktabs}
\usepackage{lscape}
\usepackage{caption}
\usepackage{subfig}
\usepackage{setspace}
\usepackage{color}
\usepackage{bbm}
\usepackage{appendix}
\usepackage{amsbsy}
\usepackage{xr}
\externaldocument{IISE}
\newtheorem{assumption}{Assumption}
\newtheorem{definition}{Definition}
\newtheorem{lemma}{Lemma}
\newtheorem{theorem}{Theorem}
\newtheorem{proposition}{Proposition}
\newtheorem{corollary}{Corollary}
%\newtheorem*{proof}{Proof.}
\renewcommand{\algorithmicrequire}{ \textbf{Input:}}      %Use Input in the format of Algorithm
\renewcommand{\algorithmicensure}{ \textbf{Output:}}
\usepackage{natbib}
\bibpunct[, ]{(}{)}{,}{a}{}{,}%
\def\bibfont{\small}%
\def\bibsep{\smallskipamount}%
\def\bibhang{24pt}%
\def\newblock{\ }%
\def\BIBand{and}%
\usepackage{array}

\newcommand{\PreserveBackslash}[1]{\let\temp=\\#1\let\\=\temp}
 
\geometry{a4paper,left=1 in,right=1 in,top=1 in,bottom=1 in}
\linespread{1.6}
\newcommand{\x}{\textcolor{blue}}
\newcommand{\va}{\textcolor{red}}
\newcommand{\tabincell}[2]{
\begin{tabular}{@{}#1@{}}#2\end{tabular}
}
\title{Online Supplement for \\Online Contextual Learning with Perishable Resources Allocation }
%\affil{}
\author{Xin Pan, Jie Song, Jingtong Zhao, Van-Anh Truong}
\affil{}
%\affil{$^1$Department of Industrial Engineering and Management, Peking University, Beijing, China, 100871, Email: panxin@pku.edu.cn, jie.song@pku.edu.cn}
%\affil{$^2$Department of Industrial Enginnering and Operations Research, Columbia University, New York, USA, NY 10027, Email: jz2477@columbia.edu, vatruong@ieor.columbia.edu}
\date{}

\begin{document}
\maketitle
%\begin{abstract}
%We formulate a novel class of online matching problems with learning. In these problems, randomly arriving customers must be matched to perishable resources so as to maximize a total expected reward. The matching accounts for variations in rewards among different customer-resource pairings. It also accounts for the perishability of the resources. Our work is motivated by a healthcare application, but it can be easily extended to other service applications. Our work belongs to the online resource allocation streams in service system. We propose the first online algorithm for contextual learning and resource allocation with perishable resources.  Our algorithm explores and exploits in distinct interweaving phases. We prove that our algorithm achieves an expected regret per period that increases sub-linearly with the number of planning cycles.  %We also prove that no online algorithm can achieve an expected regret per period that is better than $\Theta(\gamma^{-\frac{1}{2}})$ for this class of problems.
%%We propose a new algorithm that optimize resource allocation decisions while learning the uncertain reward of matching a customer to a resource}.
%
%\textbf{Keywords:}Analysis of algorithms, Approximations/heuristic, Online learning
%\end{abstract}

\begin{appendices}
	
	\section{Proof for Lemma \ref{lem:offlineupperbound}}\label{app:offlineupperbound}
	\begin{proof}
		Fix any realization of demand represented as a sequence $\mathbb{D}=\{(i_d,t_d),D\}$ ($d=1,2,...,D$) where $i_d$ and $t_d$ are the customer type and arrival time of the $d$-th arrival, respectively, and $D$ is a random variable representing the total number of arrivals.  Let $p_{i_djk}(t_d)\in [0,1]$ be the assignment probability of resource $(j,k)$ to the $d$-th arrival. Note that the optimal offline decisions must satisfy
		\begin{align*}
		&\sum_{d=1}^D p_{i_djk}(t_d)\leq c_j~~j=1,2,...,J; k=1,2,...,K,\\
		&\sum_{j=1}^J\sum_{k=1}^Kp_{ijk}(t_d)\leq  \mathbbm{1}_{i_d=i}, d=1,2,...,D,i=1,2,...,I\\
		&p_{i_djk}(t_d)=0,~\forall t_d=[0,s_{jk}-W)\cup(s_{jk},T].
		\end{align*}
		Since the inequalities hold for any realization $\{(i_d,t_d)\}$ ($d=1,2,...,D$), then it is obvious that the constraints will also be true after taking expectations on both sides. Therefore, the expected optimal offline solution is feasible in problem (\ref{LP:offline}), so that $V^{OFF}\geq V^*$.
	\end{proof}

\section{Proofs for Section \ref{sec:explore}}
\subsection{Proof for Lemma \ref{lem:normal}}
	\begin{proof}
	For the first part, because $\mathbf{r}_{\tau}=\mathbf{Z}_{\tau}\boldsymbol{\beta}+\boldsymbol{\epsilon}$, we have
	\begin{align*}
	\hat{{\boldsymbol{\beta}}} & =(\mathbf{Z}_{\tau}^{\mathrm{T}}\mathbf{Z}_{\tau})^{-1}\mathbf{Z}_{\tau}^{\mathrm{T}}\mathbf{r}_{\tau}\\
	&=(\mathbf{Z}_{\tau}^{\top}\mathbf{Z}_{\tau})^{-1}\mathbf{Z}_{\tau}^{\top}(\mathbf{Z}_{\tau}\boldsymbol{\beta}+\boldsymbol{\epsilon})\\
	&=\boldsymbol{\beta} + (\mathbf{Z}_{\tau}^{\top}\mathbf{Z}_{\tau})^{-1}\mathbf{Z}_{\tau}^{\top}\boldsymbol{\epsilon}.
	\end{align*}
	Hence $E[\hat{\boldsymbol{\beta}}]=\boldsymbol{\beta}$, and 
	\begin{align*}
	Var(\hat{\boldsymbol{\beta}})&=E[(\hat{\boldsymbol{\beta}}-\boldsymbol{\beta})(\hat{\boldsymbol{\beta}}-\boldsymbol{\beta})^{\top}]\\
	&=E[((\mathbf{Z}_{\tau}^{\top}\mathbf{Z}_{\tau})^{-1}\mathbf{Z}_{\tau}^{\top}\boldsymbol{\epsilon})((\mathbf{Z}_{\tau}^{\top}\mathbf{Z}_{\tau})^{-1}\mathbf{Z}_{\tau}^{\top}\boldsymbol{\epsilon})^{\top}]\\
	&=(\mathbf{Z}_{\tau}^{\top}\mathbf{Z}_{\tau})^{-1}\mathbf{Z}_{\tau}^{\top}E[\boldsymbol{\epsilon}\boldsymbol{\epsilon}^{\top}]\mathbf{Z}_{\tau}(\mathbf{Z}_{\tau}^{\top}\mathbf{Z}_{\tau})^{-1}\\
	&=\sigma^2(\mathbf{Z}_{\tau}^{\top}\mathbf{Z}_{\tau})^{-1}.
	\end{align*}
	The second part follows immediately from the first part.
\end{proof}

	\subsection{Proof for Lemma \ref{lem:CI}}\label{app:CI}
	\begin{proof}
	According to Lemma \ref{lem:normal}, $\mathbf{z}\hat{\boldsymbol{\beta}}$ follows the normal distribution, and the variance is known. So we can construct a confidence interval around $\mathbf{z}\hat{\boldsymbol{\beta}}$
	\begin{equation}
	{\mathbf{z}}\hat{\boldsymbol{\beta}} \pm \mathbf{z}_{\frac{\alpha}{2}}\frac{\sigma\sqrt{\mathbf{z}^{\top}(\mathbf{Z}_{\tau}^{\top}\mathbf{Z}_{\tau})^{-1}\mathbf{z})}}{\sqrt{\tau}}
	\end{equation}
	with confidence level $1-\alpha$, where $\mathbf{z}_{\frac{\alpha}{2}}$ is the standard normal distribution coefficient. 
	
	Next we show how the width of confidence interval changes with the scaling parameter. As a property of eigenvalues, we have 
	\begin{equation}\label{eqn:eigenvalue}
	\mathbf{z}^{\top}(\mathbf{Z}_{\tau}^{\top}\mathbf{Z}_{\tau})^{-1}\mathbf{z}\leq \lambda_{max} \mathbf{z}^{\top}\mathbf{z}\leq tr((\mathbf{Z}_{\tau}^{\top}\mathbf{Z}_{\tau})^{-1}) \mathbf{z}^{\top}\mathbf{z},
	\end{equation}
	where $\lambda_{max}$ is the maximum eigenvalue of $(\mathbf{Z}_{\tau}^{\top}\mathbf{Z}_{\tau})^{-1}$. By the Sherman-Morrison formula, after adding one more sample $\mathbf{z}'$ into $\mathbf{Z}_{\tau}$, the trace of the inverse matrix $(\mathbf{Z}^{\top}\mathbf{Z})^{-1}_{\tau}$ becomes
	\begin{align}
	\notag tr((\mathbf{Z}_{\tau+1}^{\top}\mathbf{Z}_{\tau+1})^{-1}) =& tr((\mathbf{Z}_{\tau}^{\top}\mathbf{Z}_{\tau})^{-1})-\frac{tr((\mathbf{Z}_{\tau}^{\top}\mathbf{Z}_{\tau})^{-1}\mathbf{z}'\mathbf{z}'^{\top}(\mathbf{Z}_{\tau}^{\top}\mathbf{Z}_{\tau})^{-1})}{1+\mathbf{z}'^{\top}(\mathbf{Z}_{\tau}^{\top}\mathbf{Z}_{\tau})^{-1}\mathbf{z}'}\\
	\notag \leq&tr((\mathbf{Z}_{\tau}^{\top}\mathbf{Z}_{\tau})^{-1})-\frac{tr((\mathbf{Z}_{\tau}^{\top}\mathbf{Z}_{\tau})^{-1}\mathbf{z}'\mathbf{z}'^{\top}(\mathbf{Z}_{\tau}^{\top}\mathbf{Z}_{\tau})^{-1})}{1+tr((\mathbf{Z}_{\tau}^{\top}\mathbf{Z}_{\tau})^{-1})\mathbf{z}'^{\top}\mathbf{z}'}\\
	\label{eqn:trace}\leq &tr((\mathbf{Z}_{\tau}^{\top}\mathbf{Z}_{\tau})^{-1})-\frac{tr(\mathbf{z}'\mathbf{z}'^{\top})}{tr^2(\mathbf{Z}_{\tau}^{\top}\mathbf{Z}_{\tau})(1+tr((\mathbf{Z}_{\tau}^{\top}\mathbf{Z}_{\tau})^{-1})\mathbf{z}'^{\top}\mathbf{z}')},
	%\leq &tr((\mathbf{Z}_{\tau}^{\top}\mathbf{Z}_{\tau})^{-1})-\frac{tr(\mathbf{z}'\mathbf{z}'^{\top})}{tr^2((\mathbf{Z}_{\tau}^{\top}\mathbf{Z}_{\tau}))(1+tr((\mathbf{Z}_{\tau}^{\top}\mathbf{Z}_{\tau})^{-1})\mathbf{z}'^{\top}\mathbf{z}')},
	\end{align} 
	where the first inequality follows (\ref{eqn:eigenvalue}), and the second inequality follows from $tr(AB)\leq tr(A)tr(B)$ so that $tr(\mathbf{z}'\mathbf{z}'^{\top})= tr((\mathbf{Z}_{\tau}^{\top}\mathbf{Z}_{\tau})(\mathbf{Z}_{\tau}^{\top}\mathbf{Z}_{\tau})^{-1}\mathbf{z}'\mathbf{z}'^{\top}(\mathbf{Z}_{\tau}^{\top}\mathbf{Z}_{\tau})^{-1}(\mathbf{Z}_{\tau}^{\top}\mathbf{Z}_{\tau}))\leq tr(\mathbf{Z}_{\tau}^{\top}\mathbf{Z}_{\tau})tr((\mathbf{Z}_{\tau}^{\top}\mathbf{Z}_{\tau})^{-1}\mathbf{z}'\mathbf{z}'^{\top}(\mathbf{Z}_{\tau}^{\top}\mathbf{Z}_{\tau})^{-1})\\tr(\mathbf{Z}_{\tau}^{\top}\mathbf{Z}_{\tau})$. Suppose $a\leq \mathbf{z}'^{\top}\mathbf{z}'\leq b$ for all possible $\mathbf{z}'$, then it is obvious that $\tau a\leq tr((\mathbf{Z}_{\tau}^{\top}\mathbf{Z}_{\tau}))\leq \tau b$. Let $x_{\tau}=tr((\mathbf{Z}_{\tau}^{\top}\mathbf{Z}_{\tau})^{-1})$, then (\ref{eqn:trace}) becomes
	\begin{equation}
	x_{\tau}\leq x_{\tau-1}-\frac{a}{(\tau-1)^2 b^2(1+bx_{\tau-1})}.
	\end{equation}
	We suppose that $\tau\in [\tau_0,\infty)$ where $\tau=\tau_0$ is the first time that the sample matrix $\mathbf{Z}$ becomes a full rank matrix. It is obvious that sequence $[x_{\tau}]$ is decreasing, so that $x_{\tau}\leq x_{\tau_0}$ for all $\tau\in [\tau_0,\infty)$. Then $\mathbf{z}_{\frac{\alpha}{2}}\frac{\sigma\sqrt{\mathbf{z}^{\top}(\mathbf{Z}^{\top}\mathbf{Z})^{-1}\mathbf{z})}}{\sqrt{\tau}}\leq \frac{\eta_1}{\sqrt{\tau}}$ where $\eta_1=\mathbf{z}_{\frac{\alpha}{2}}\sigma\sqrt{x_{\tau_0}b}$, so that
	\begin{equation}
	P\{||r-\tilde{r}||_{\infty}\leq \frac{\eta_1}{\sqrt{\tau}}\}\geq 1-\alpha.
	\end{equation}
	\end{proof}

	\subsection{Proof for Lemma \ref{lem:numberofarrival}}\label{app:numberofarrival}
\begin{proof}
	From Chebyshev's inequality, we have
	
	\[
	P\bigg(|\tau-{E}[\tau]|\geq\sqrt{\frac{Var[\tau]}{\delta_{\tau}}}\bigg)\leq\delta_{\tau}.
	\]
	
	So 
	
	\[
	P(\tau\leq{E}[\tau]-\sqrt{\frac{Var[\tau]}{\delta_{\tau}}})\leq P(|\tau-{E}[\tau]|\geq\sqrt{\frac{Var[\tau]}{\delta_{\tau}}})\leq\delta_{\tau}.
	\]
	
	Let $\tau_{jk}$ be the number of all customer types admitted to the $k$th resource of type $j$ under the exploration subroutine. Then ${E}[\tau]=K_0\sum_{j=1}^{N}E[\tau_{jk_{}}]$ considering recurrent arrivals. $\tau_{jk_{}}$ is a truncated Poisson random variable with rate $\lambda_{j}=\sum_{i=1}^{M}D_{ij}$, and it cannot exceed the resource capacity $c_{j}$. Therefore,
	
	\begin{align*}
	E[\tau_{jk}]= & \sum_{l=1}^{c_{j}}l\frac{\lambda_{j}^{l}e^{-\lambda_{j}}}{l!}+\sum_{l=c_{j}+1}^{\infty}c_{j}\frac{\lambda_{j}^{l}e^{-\lambda_{j}}}{l!}\\
	= & \lambda_{j}\sum_{l=1}^{c_{j}}\frac{\lambda_{j}^{l-1}e^{-\lambda_{j}}}{(l-1)!}+\sum_{l=c_{j}+1}^{\infty}c_{j}\frac{\lambda_{j}^{l}e^{-\lambda_{j}}}{l!}\\
	\geq & \lambda_{j}\sum_{l=0}^{c_{j}-1}\frac{\lambda_{j}^{l}e^{-\lambda_{j}}}{l!}\\
	= & \lambda_{j}P(\textrm{Poisson}(\lambda_{j})<c_{j})\\
	= & \lambda_{j}(1-P(\textrm{Poisson}(\lambda_{j})\geq c_{j}))\\
	\geq & \lambda_{j}(1-\frac{\lambda_{j}}{c_{j}}),
	\end{align*}
	where we have used the Markov inequality in the last step. Hence,
	${E}[\tau]\geq K_0\sum_{j=1}^{N}\lambda_{j}(1-\frac{\lambda_{j}}{c_{j}})$. 
	
	
	Since $\tau$ is the sum of those truncated Poisson random variables,	its variance is smaller than that of the sum of those un-truncated Poisson random variables. So $Var[\tau]\leq K_0\sum_{j=1}^{N}\lambda_{j}$.	Let $\mu=K_0\sum_{j=1}^{N}\sum_{i=1}^{M}D_{ij}(1-\frac{\sum_{i=1}^{M}D_{ij}}{c_{j}})-\sqrt{\frac{K_0\sum_{j=1}^{N}\sum_{i=1}^{M}D_{ij}}{\delta_{\tau}}}\leq {E}[\tau]-\sqrt{\frac{Var[\tau]}{\delta_{\tau}}}$.  Then $P(\tau\leq \mu)\leq P(\tau\leq{E}[\tau]-\sqrt{\frac{Var[\tau]}{\delta_{\tau}}})\leq\delta_{\tau}.$
\end{proof}

	\subsection{Proof for Theorem \ref{the:error}}
\begin{proof}		
	Let $F_{MN+1}$ denote the event that the observation matrix $\mathbf{Z}$ has full rank $M\times N+1$. Then by Lemma \ref{lem:CI} and Lemma \ref{lem:numberofarrival} we have
	\begin{align*}
	P\{||r-\tilde{r}||_{\infty}\geq \frac{\eta_1}{\sqrt{\mu}}|\tau, F_{MN+1}\} & =P\{||r-\tilde{r}||_{\infty}\geq \frac{\eta_1}{\sqrt{\mu}}|\tau\geq \mu, F_{MN+1}\}P(\tau\geq \mu)\\
	& +P\{||r-\tilde{r}||_{\infty}\geq \frac{\eta_1}{\sqrt{\mu}}|\tau\leq \mu, F_{MN+1}\}P(\tau\leq \mu)\\
	& \leq P\{||r-\tilde{r}||_{\infty}\geq \frac{\eta_1}{\sqrt{\mu}}|\tau\geq \mu, F_{MN+1}\}+P(\tau\leq \mu)\\
	& \leq \alpha + \delta_{\tau}.
	\end{align*}
\end{proof}

	%\section{Proof for lemma \ref{lem:dualsolution}}\label{app:dualsolution}
	%\proof{Proof.}
	%It's easy to check that $(\alpha^*, \boldsymbol{\beta}^*, \omega^*)$ is feasible for the dual problem. We will construct a feasible solution for the primal problem and show that it satisfies complementary slackness with $(\alpha^*, \beta^*, \omega^*)$.
	%
	%Let $f_t^{*}(x)=0$ for $t\geq S+1$ and $x\leq 0$. For $t=1,2,...,S$, let $r_t^*=1$ and 
	%\begin{equation}
	%f_t^*(x)=pr^*_t+pf_{t+1}^*(x-1)+(1-p)f_{t+1}^*(x)\geq 0.
	%\end{equation}
	%
	%We claim that $f_{t}^*(x)\geq f_{t+1}^*(x)$ for all $t=1,2,...,S$ and $x=1,2,...,c$. Clearly, the claim holds trivially for $t=S+1$, and then it can be proved easily by induction. That is, assuming the claim holds for $t+1$ and then show that
	%\begin{align}
	%f_{t}^*(x)-f_{t+1}^*(x)&=pr^*_t+pf_{t+1}^*(x-1)+(1-p)f_{t+1}^*(x)-(pr^*_{t+1}+pf_{t+2}^*(x-1)+(1-p)f_{t+2}^*(x))\\
	%&=p(f_{t+1}^*(x-1)-f_{t+2}^*(x-1))+(1-p)(f_{t+1}^*(x)-f_{t+2}^*(x))\\
	%&\geq 0.
	%\end{align}
	%Therefore, the solution is primal feasible. 
	%
	%Then we show $(\alpha^*,\beta^*,\omega^*)$ are complementary slack for the primal feasible solution, that is
	%\begin{align*}
	%&\alpha_{tx}^*(-f^*_t(x)+ p r^*_t + pf^*_{t+1}(x-1)+(1-p)f^*_{t+1}(x))=0,\\
	%&\beta_{tx}^*(-f^*_{t}(x)+f^*_{t+1}(x))=0,\\
	%&\omega_{t}^*(r^*_t-1)=0.
	%\end{align*}
	%The last two equalities hold by definition, since $\beta^*=0$ and $r^*_t=1$, respectively.  The first equality holds  also by definition, since
	%\begin{eqnarray*}
	%f^*_t(x)= p r^*_t + pf^*_{t+1}(x-1)+(1-p)f^*_{t+1}(x).
	%\end{eqnarray*}
	%Therefore, $(\alpha^*,\beta^*,\omega^*)$ is an optimal solution for the dual problem.
	%\halmos
	%\endproof

\subsection{Proof for Lemma \ref{lem:min}}
\begin{proof} 
	Note that $1-x\leq e^{-x}$ for $0\leq x\leq 1$, therefore 
	\begin{equation}
	1-\frac{d_{ij}^{*}}{c_{j}e}\leq e^{-\frac{d_{ij}^{*}}{c_{j}e}}.
	\end{equation}
	Thus $(1-\frac{d_{ij}^{*}}{c_{j}e})^{K_0'c_{j}}\leq e^{-\frac{d_{ij}^{*}K_0'}{e}}$, and
	\begin{align}
	P(F_{MN+1})&\geq \Pi_{j=1}^{N}(1-\sum_{i=1}^{M}[(1-\frac{d_{ij}^*}{c_{j}e})^{K_0'c_{j}}])p_{delay}\\
	&\geq \Pi_{j=1}^N(1-\sum_{i=1}^M e^{-\frac{d_{ij}^{*}K_0'}{e}})p_{delay}
	\end{align}
	For an exploration phase of length $K_0 \geq-\frac{e}{\min_{i,j} {d}_{ij}^*}\ln \frac{1-(\frac{p_f}{p_{delay}})^{\frac{1}{N}}}{M}-\frac{\log (1-p_{delay})}{{D}_L}$, we have
	\begin{align*}
	P(F_{MN+1})&\geq \Pi_{j=1}^N(1-\sum_{i=1}^M e^{\frac{d_{ij}^*}{\min_{i,j} d_{ij}^*}\ln \frac{1-(\frac{p_f}{p_{delay}})^{\frac{1}{N}}}{M}})p_{delay}\\
	&\geq \Pi_{j=1}^N(1-\sum_{i=1}^M \frac{1-(\frac{p_f}{p_{delay}})^{\frac{1}{N}}}{M})p_{delay}\\
	&= p_f.
	\end{align*}	
\end{proof}

\subsection{Proof for Theorem \ref{cor:estimateerror}}
\begin{proof}
	
	From Theorem \ref{the:error}, we get:
	
	\begin{align*}
	P\{||r-\tilde{r}||_{\infty}\geq \frac{\eta_1}{\sqrt{\mu}}\}  & =P\{||r-\tilde{r}||_{\infty}\geq \frac{\eta_1}{\sqrt{\mu}}| F_{MN+1}\} P(F_{MN+1})+\\
	& P\{||r-\tilde{r}||_{\infty}\geq \frac{\eta_1}{\sqrt{\mu}}|\bar{F}_{MN+1}\} P(\bar F_{MN+1})\\
	& \leq P\{||r-\tilde{r}||_{\infty}\geq \frac{\eta_1}{\sqrt{\mu}}| F_{MN+1}\} P(F_{MN+1})+P(\bar F_{MN+1})\\
	& =P\{||r-\tilde{r}||_{\infty}\geq \frac{\eta_1}{\sqrt{\mu}}| F_{MN+1}\}P(F_{MN+1})+1-P(F_{MN+1})\\
	& =(P\{||r-\tilde{r}||_{\infty}\geq \frac{\eta_1}{\sqrt{\mu}}| F_{MN+1}\}-1)P(F_{MN+1})+1\\
	& \leq(P\{||r-\tilde{r}||_{\infty}\geq \frac{\eta_1}{\sqrt{\mu}}| F_{MN+1}\}-1)p_f+1\\
	&\leq (\alpha+\delta_{\tau}-1)p_f+1
	\end{align*}
	
	%	We know that $|{\displaystyle |\tilde{r}-r||_{\infty}}=\max_z|\hat{\beta}^{\top}z-\beta^{\top} z|\leq \max_z||\hat{\beta}-\beta||_{2}||z||_{2}$.  Because $||(\hat{\beta}-\beta)^{\top}||_{2}\leq ||\hat{\theta}-\theta||_{2}$, we have $|{\displaystyle |\tilde{r}-r||_{\infty}}\leq\eta_{3}|{||\hat{\theta}-\theta||_{2}}$ for some constant $\eta_3$ .  So
	%	
	%	\begin{align*}
	%	P(|{\displaystyle |\tilde{r}-r||_{\infty}} & \geq\delta)\leq P(\eta_{3}|{\displaystyle |\hat{\theta}-\theta||_{2}\geq\delta)=P(|{\displaystyle |\hat{\theta}-\theta||_{2}\geq\frac{\delta}{\eta_{3}})}}.
	%	\end{align*}
	%	
	%	Plugging into the previous equation, we obtain the bound.	
\end{proof}

\section{Proofs for Section \ref{sec:optimalexploration}}
\subsection{Proof for lemma \ref{lem:regretsum}}
\begin{proof}
	We obtain the total regret by summing up the regret in the exploration phase and that in the exploitation phase as follows 
	\begin{equation}
	\begin{split}
	Reg^{TP} = &  Reg^{TP}(0,T_0)+ Reg^{TP}(T_0,T).
	\end{split}
	\end{equation}
	The first term is the regret incurred in the exploration phase, and it is smaller than $K_0 ||c||_1$ since each single resource can only incur regret at most $1$. Along with regret of exploitation phase, we have
	\begin{align*}
	Reg^{TP}(0,T)&\leq K_0 ||c||_1 + \frac{3}{2}(K-K_0) \|c\|_1\eta_{1}(\eta_{2}K_{0}-\eta_{3}\sqrt{K_{0}})^{-0.5}\\
	&\leq K_0 ||c||_1+\frac{3}{2}(K-K_0) \|c\|_1\eta_{1}(\eta_{2}-\eta_{3})^{-0.5}K_{0}^{-0.5}
	\end{align*}
	
\end{proof}


	\subsection{Proof for Lemma \ref{lem:OptimalLength}}\label{app:optimallength}
	\begin{proof}
	According to the expression $Reg(K_0)	=K_0 ||c||_1+\eta_4\|c\|_1(K-K_0)  K_{0}^{-0.5}$,  we have
	\begin{equation}
	\frac{\partial Reg(K_0)}{\partial K_0}=a_1-a_2K_0^{-1.5}+a_3K_0^{-0.5},
	\end{equation}
	where $a_1=||c||_1$, $a_2=0.5||c||_1{\eta}_4K$, and $a_3=-0.5||c||_1{\eta}_4$. Therefore, to find the root of the above equation, we have to solve a cubic polynomial
	\begin{equation}\label{eqn:cubic}
	a_1x^3+a_3x^2-a_2=0,
	\end{equation}
	where $x=K_0^{0.5}$. Since the discriminant of the equation $\Delta=-4a_3^3(-a_2)-27a_1^2a_2^2<0$, the equation has only one real root and two conjugate non-real roots.
	
	To solve the cubic polynomial, we transform the equation into another standard form
	\begin{equation}
	x^3+px+q=0,
	\end{equation}
	where $p=\frac{-a_3^2}{3a_1^2}$ and $q=\frac{-27a_1^2a_2+2a_3^3}{27a_1^3}$. Note that $\frac{\partial (a_1x^3+a_3x^2-a_2)}{\partial x}=3a_1x^2+2a_3x>0$ for $x\geq 0$, because when $K$ is a large number there are $a_1>0>a_3$ and $|a_1|\gg|a_3|$. So there is only one solution for (\ref{eqn:cubic}) when $x>0$, which is
	\begin{equation}
	x=\sqrt[3]{-\frac{q}{2}+\sqrt{\frac{q^2}{4}+\frac{p^3}{27}}}+\sqrt[3]{-\frac{q}{2}-\sqrt{\frac{q^2}{4}+\frac{p^3}{27}}}.
	\end{equation}
	Since $p=O(1)$ and $q=O(K)$, when $K$ is a large number we have $|q|\gg |p|$.  Hence, we have an approximate form of the solution, namely $x=\sqrt[3]{-q}=\sqrt[3]{\frac{27a_1^2a_2-2a_3^3}{27a_1^3}}$. Furthermore, we have
	\begin{equation}
	K_0^*= x^2\approx (\frac{a_2}{a_1})^{\frac{2}{3}}=(0.5\eta_4K)^{\frac{2}{3}}.
	\end{equation}

	\end{proof}

\section{Proof for Theorem \ref{the:warmstart}}
	\begin{proof}
According to Theorem \ref{cor:estimateerror}, with the current available data $\mu_0^{\omega-1}$, if an exploration phase $K_0^{\omega}$ is selected, the estimation error will be
\begin{equation}
||r-\tilde{r}||_{\infty}\leq \frac{{\eta}_1}{\sqrt{\mu^{\omega}+\mu_0^{\omega-1}}}={\eta}_1({\eta}_2K_0^{\omega}-{\eta}_3\sqrt{K_0^{\omega}}+\mu_0^{\omega-1})^{-0.5}\leq {\eta}_1(({\eta}_2-{\eta}_3)K_0^{\omega}+\mu_0^{\omega-1})^{-0.5},
\end{equation}
where $\mu^{\omega}={\eta}_2K_0^{\omega}-{\eta}_3\sqrt{K_0^{\omega}}$. So we can again proceed as before and now we have 
$$Reg^{\omega}(K_0^{\omega})=K_0^{\omega}||{c}||_1+||{c}||_1 {\eta}_4(K-K_0^{\omega})(K_0^{\omega}+\frac{\mu_0^{\omega-1}}{{\eta}_2-{\eta}_3})^{-0.5},$$
where ${\eta}_4=\frac{3}{2}\eta_1({\eta}_2-{\eta}_3)^{-0.5}$. In the following let $X_0^{\omega-1}=\frac{\mu_0^{\omega-1}}{{\eta}_2-{\eta}_3}$.  So $X_0^{\omega-1}$ is the total number of previous data in terms of the number of cycles.\\
According to the expression of $Reg^{\omega}(K_0^{\omega})$,  we have
\begin{equation}
\frac{\partial Reg^{\omega}(K_0^{\omega})}{\partial K_0^{\omega}}=a_1-a_2(K_0^{\omega}+X_0^{\omega-1})^{-1.5}+a_3(K_0^{\omega}+X_0^{\omega-1})^{-0.5},
\end{equation}
where $a_1=||{c}||_1$, $a_2=0.5||{c}||_1 {\eta}_4(K+X_0^{\omega-1})$, and $a_3=-0.5||{c}||_1{\eta}_4$. Therefore, to find the root of the above equation, we have to solve a cubic polynomial
\begin{equation}
a_1x^3+a_3x^2-a_2=0,
\end{equation}
where $x=(K_0^{\omega}+X_0^{\omega-1})^{0.5}$. Since the discriminant of the equation $\Delta=-4a_3^3(-a_2)-27a_1^2a_2^2<0$, the equation has only one real roots.\\
To solve the cubic polynomial, we transform the equation into another standard form
\begin{equation}
x^3+px+q=0,
\end{equation}
where $p=\frac{-a_3^2}{3a_1^2}$ and $q=\frac{-27a_1^2a_2+2a_3^3}{27a_1^3}$. The solution is
\begin{equation}
x=\sqrt[3]{-\frac{q}{2}+\sqrt{\frac{q^2}{4}+\frac{p^3}{27}}}+\sqrt[3]{-\frac{q}{2}-\sqrt{\frac{q^2}{4}+\frac{p^3}{27}}}.
\end{equation}
Since $p=O(1)$ and $q=-O(X_0^{\omega-1})$, when $X_0^{\omega-1}\rightarrow \infty$ we have $|q|\gg |p|$.  Hence, we have an approximate form of the solution, namely $x\approx \sqrt[3]{-q}=\sqrt[3]{\frac{27a_1^2a_2-2a_3^3}{27a_1^3}}$. Furthermore,  since $a_1=O(1)$, $a_2=O(X_0^{\omega-1})$ and $a_3=O(1)$, when $X_0^{\omega-1}\rightarrow \infty$, we have
\begin{equation}\label{eqn:warmexploration}
K_0^{\omega}=x^2-X_0^{\omega-1}\approx(\frac{a_2}{a_1})^{\frac{2}{3}}-X_0^{\omega-1}=(\frac{ {\eta}_4(K+X_0^{\omega-1})}{2})^{\frac{2}{3}}-X_0^{\omega-1}.
\end{equation}\\
%And inserting $X_0=X_0^{\omega-1}$ for epoch $\omega$, we get $K_0^{\omega}$ accordingly.
Inserting $K_0^{\omega}$ into the regret bound and considering $K\rightarrow \infty$, we have 
\begin{equation}
Reg^{\omega}= O(\left[{\eta}_4(K+X_0^{\omega-1})\right]^{\frac{2}{3}}||{c}||_1-X_0^{\omega-1}||{c}||_1).
\end{equation}
It is clear that within each epoch, the regret $Reg^{\omega}$ has the same order as the exploration length $K_0^{\omega}$, i.e., $Reg^{\omega}=O(K_0^{\omega})$. Let  $Reg^{MP}=\sum_{\omega=1}^{\Omega}Reg^{\omega}$. Then $Reg^{MP}=O(X_0^{\Omega})$, for $X_0^{\Omega}=\sum_{\omega=1}^{\Omega}K_0^{\omega}$. Note that $X_0^{\omega-1}$ is increasing with $\omega$ according to the definition, and when $X_0^{\omega-1}$ is large enough, $K_0^{\omega}$ goes to 0. This implies that $X_0^{\omega-1}$ will converge. Note that $X_0^1=O(K^{\frac{2}{3}})$, and it also implies that $X_0^{\omega-1}=O(K^{\frac{2}{3}})$ for all $\omega=3,...,\Omega+1$ since if $X_0^{\omega-1}$ exceeds $O(K^{\frac{2}{3}})$, $K_0^{\omega}$ would become negative when $K\rightarrow\infty$. Therefore, when $K\rightarrow \infty$, we have $Reg^{MP}=O(X_0^{\Omega})=O(K^{\frac{2}{3}})$. Let $K_{total}=\Omega K$ be the total number of cycles for all horizons, then we have $Reg^{MP}=O(K_{total}^{\frac{2}{3}})$.
	\end{proof}

\section{Table of average regret of t-test}\label{app:t-test}


\begin{table}[htbp]
	\centering
	\caption{Summary of average regret and results of t-test.}
	\label{tab:t-test}
	\footnotesize
	\setlength{\arraycolsep}{0pt}
	\begin{spacing}{1.19}
	\begin{tabular}{clccclccclccclcc}
		\hline
		&  & \multicolumn{3}{c}{Mean of average regret}                                              &  & \multicolumn{3}{c}{Std of average regret}                                &  & \multicolumn{3}{c}{Confidence interval width}                                           &  & \multicolumn{2}{c}{T-test result}                                                \\
		$K$ &  & TP   & \begin{tabular}[c]{@{}c@{}}Greedy\\ exp.\end{tabular} & $\epsilon$ Greedy &  & TP   & \begin{tabular}[c]{@{}c@{}}Greedy\\ exp.\end{tabular} & $\epsilon$ Greedy &  & TP   & \begin{tabular}[c]{@{}c@{}}Greedy\\ exp.\end{tabular} & $\epsilon$ Greedy &  & \begin{tabular}[c]{@{}c@{}}Greedy\\ exp.\end{tabular} & $\epsilon$ Greedy \\ \cline{3-5} \cline{7-9} \cline{11-13} \cline{15-16} 
		5   &  & 68.2 & 83.0                                                         & 73.2              &  & 33.4 & 18.1                                                         & 11.4              &  & 12.0 & 6.5                                                          & 4.1               &  & 0.72                                                         & 0.78              \\
		10  &  & 64.0 & 88.0                                                         & 75.0              &  & 32.5 & 24.6                                                         & 7.8               &  & 11.6 & 8.8                                                          & 2.8               &  & 1.48                                                         & 1.80              \\
		15  &  & 63.3 & 84.0                                                         & 79.3              &  & 6.4  & 14.1                                                         & 5.2               &  & 2.3  & 5.0                                                          & 1.9               &  & 5.67                                                         & 10.65             \\
		20  &  & 61.5 & 84.5                                                         & 76.0              &  & 7.1  & 13.0                                                         & 5.4               &  & 2.5  & 4.7                                                          & 1.9               &  & 5.37                                                         & 8.94              \\
		25  &  & 62.4 & 82.4                                                         & 73.6              &  & 6.7  & 7.0                                                          & 5.2               &  & 2.4  & 2.5                                                          & 1.9               &  & 6.34                                                         & 7.23              \\
		30  &  & 62.7 & 80.3                                                         & 74.7              &  & 5.5  & 6.3                                                          & 6.1               &  & 2.0  & 2.3                                                          & 2.2               &  & 7.84                                                         & 7.98              \\
		35  &  & 63.1 & 80.6                                                         & 74.6              &  & 6.1  & 6.1                                                          & 5.3               &  & 2.2  & 2.2                                                          & 1.9               &  & 7.27                                                         & 7.79              \\
		40  &  & 62.8 & 79.0                                                         & 73.3              &  & 6.5  & 5.3                                                          & 5.2               &  & 2.3  & 1.9                                                          & 1.9               &  & 6.84                                                         & 6.90              \\
		45  &  & 63.8 & 79.8                                                         & 73.8              &  & 5.6  & 6.4                                                          & 4.3               &  & 2.0  & 2.3                                                          & 1.5               &  & 6.48                                                         & 7.80              \\
		50  &  & 62.0 & 79.0                                                         & 72.8              &  & 6.1  & 6.3                                                          & 5.0               &  & 2.2  & 2.3                                                          & 1.8               &  & 6.77                                                         & 7.52              \\
		55  &  & 61.8 & 77.5                                                         & 72.9              &  & 6.2  & 5.6                                                          & 4.7               &  & 2.2  & 2.0                                                          & 1.7               &  & 7.27                                                         & 7.84              \\
		60  &  & 63.0 & 78.3                                                         & 73.7              &  & 6.0  & 5.1                                                          & 4.3               &  & 2.1  & 1.8                                                          & 1.5               &  & 7.41                                                         & 7.93              \\
		65  &  & 61.5 & 77.7                                                         & 72.5              &  & 5.4  & 5.8                                                          & 4.4               &  & 1.9  & 2.1                                                          & 1.6               &  & 7.55                                                         & 8.53              \\
		70  &  & 61.4 & 78.6                                                         & 72.9              &  & 6.0  & 4.6                                                          & 3.8               &  & 2.1  & 1.6                                                          & 1.4               &  & 8.32                                                         & 8.84              \\
		75  &  & 61.3 & 77.3                                                         & 72.0              &  & 6.0  & 3.0                                                          & 4.0               &  & 2.2  & 1.1                                                          & 1.4               &  & 8.71                                                         & 8.11              \\
		80  &  & 62.5 & 77.5                                                         & 72.5              &  & 5.5  & 3.5                                                          & 4.7               &  & 2.0  & 1.2                                                          & 1.7               &  & 8.46                                                         & 7.63              \\
		85  &  & 62.4 & 77.6                                                         & 71.8              &  & 5.7  & 4.4                                                          & 4.9               &  & 2.0  & 1.6                                                          & 1.8               &  & 7.13                                                         & 6.82              \\
		90  &  & 61.1 & 76.7                                                         & 72.2              &  & 5.4  & 4.4                                                          & 4.2               &  & 1.9  & 1.6                                                          & 1.5               &  & 8.78                                                         & 8.88              \\
		95  &  & 62.1 & 77.9                                                         & 72.6              &  & 6.0  & 5.3                                                          & 4.2               &  & 2.1  & 1.9                                                          & 1.5               &  & 7.20                                                         & 7.86              \\
		100 &  & 61.0 & 77.0                                                         & 72.0              &  & 6.2  & 2.8                                                          & 3.7               &  & 2.2  & 1.0                                                          & 1.3               &  & 8.86                                                         & 8.38              \\
		105 &  & 61.0 & 77.1                                                         & 72.4              &  & 6.0  & 3.4                                                          & 4.4               &  & 2.1  & 1.2                                                          & 1.6               &  & 9.07                                                         & 8.44              \\
		110 &  & 61.8 & 78.2                                                         & 72.7              &  & 5.4  & 4.8                                                          & 4.1               &  & 1.9  & 1.7                                                          & 1.5               &  & 8.29                                                         & 8.84              \\
		115 &  & 60.9 & 77.4                                                         & 72.2              &  & 5.9  & 5.6                                                          & 3.0               &  & 2.1  & 2.0                                                          & 1.1               &  & 7.64                                                         & 9.42              \\
		120 &  & 61.7 & 77.5                                                         & 71.7              &  & 5.9  & 4.6                                                          & 3.3               &  & 2.1  & 1.6                                                          & 1.2               &  & 7.30                                                         & 8.06              \\
		125 &  & 60.8 & 76.8                                                         & 71.2              &  & 5.5  & 2.2                                                          & 3.3               &  & 2.0  & 0.8                                                          & 1.2               &  & 9.68                                                         & 8.95              \\
		130 &  & 61.5 & 77.7                                                         & 72.3              &  & 5.7  & 3.7                                                          & 2.8               &  & 2.1  & 1.3                                                          & 1.0               &  & 8.62                                                         & 9.23              \\
		135 &  & 61.5 & 77.0                                                         & 71.9              &  & 5.6  & 3.9                                                          & 2.5               &  & 2.0  & 1.4                                                          & 0.9               &  & 8.31                                                         & 9.19              \\
		140 &  & 61.4 & 77.1                                                         & 72.1              &  & 5.8  & 4.8                                                          & 4.2               &  & 2.1  & 1.7                                                          & 1.5               &  & 7.83                                                         & 8.19              \\
		145 &  & 61.4 & 77.2                                                         & 72.4              &  & 5.5  & 4.0                                                          & 2.2               &  & 2.0  & 1.4                                                          & 0.8               &  & 8.85                                                         & 10.14             \\
		150 &  & 61.3 & 77.3                                                         & 72.0              &  & 5.7  & 4.1                                                          & 3.3               &  & 2.0  & 1.5                                                          & 1.2               &  & 8.39                                                         & 8.92              \\
		155 &  & 61.3 & 76.8                                                         & 71.6              &  & 5.7  & 3.5                                                          & 4.0               &  & 2.0  & 1.3                                                          & 1.4               &  & 8.40                                                         & 8.11              \\
		160 &  & 61.9 & 77.5                                                         & 72.5              &  & 5.7  & 2.7                                                          & 2.8               &  & 2.1  & 1.0                                                          & 1.0               &  & 9.17                                                         & 9.09              \\
		165 &  & 61.2 & 77.0                                                         & 72.1              &  & 5.8  & 3.6                                                          & 3.0               &  & 2.1  & 1.3                                                          & 1.1               &  & 8.73                                                         & 9.17              \\
		170 &  & 61.2 & 77.1                                                         & 71.8              &  & 5.9  & 2.9                                                          & 3.4               &  & 2.1  & 1.0                                                          & 1.2               &  & 8.89                                                         & 8.53              \\
		175 &  & 60.6 & 76.6                                                         & 71.4              &  & 5.9  & 2.7                                                          & 3.8               &  & 2.1  & 1.0                                                          & 1.3               &  & 9.11                                                         & 8.46              \\
		180 &  & 61.1 & 77.2                                                         & 72.2              &  & 5.9  & 3.6                                                          & 2.4               &  & 2.1  & 1.3                                                          & 0.9               &  & 8.73                                                         & 9.49              \\
		185 &  & 61.1 & 76.8                                                         & 71.9              &  & 6.3  & 3.7                                                          & 2.2               &  & 2.3  & 1.3                                                          & 0.8               &  & 8.09                                                         & 8.84              \\
		190 &  & 60.5 & 76.8                                                         & 71.6              &  & 5.7  & 2.3                                                          & 2.1               &  & 2.0  & 0.8                                                          & 0.8               &  & 9.85                                                         & 9.98              \\
		195 &  & 61.5 & 77.4                                                         & 72.3              &  & 5.4  & 3.4                                                          & 2.0               &  & 1.9  & 1.2                                                          & 0.7               &  & 9.25                                                         & 10.28             \\
		200 &  & 61.5 & 77.0                                                         & 72.0              &  & 5.5  & 3.5                                                          & 2.5               &  & 2.0  & 1.3                                                          & 0.9               &  & 8.79                                                         & 9.52              \\
		205 &  & 61.0 & 77.1                                                         & 71.7              &  & 5.7  & 3.3                                                          & 2.3               &  & 2.0  & 1.2                                                          & 0.8               &  & 8.98                                                         & 9.61              \\
		210 &  & 61.4 & 77.1                                                         & 72.4              &  & 5.3  & 3.5                                                          & 1.9               &  & 1.9  & 1.3                                                          & 0.7               &  & 9.46                                                         & 10.70             \\
		215 &  & 61.4 & 77.2                                                         & 72.1              &  & 5.4  & 4.4                                                          & 2.1               &  & 1.9  & 1.6                                                          & 0.7               &  & 8.37                                                         & 10.06             \\
		220 &  & 60.9 & 76.8                                                         & 71.8              &  & 5.8  & 2.3                                                          & 1.1               &  & 2.1  & 0.8                                                          & 0.4               &  & 9.54                                                         & 10.08             \\
		225 &  & 60.9 & 76.9                                                         & 71.6              &  & 5.8  & 4.0                                                          & 2.1               &  & 2.1  & 1.4                                                          & 0.8               &  & 8.33                                                         & 9.48              \\
		230 &  & 61.3 & 77.4                                                         & 72.2              &  & 5.7  & 3.7                                                          & 1.6               &  & 2.0  & 1.3                                                          & 0.6               &  & 8.83                                                         & 10.13             \\
		235 &  & 61.3 & 77.0                                                         & 71.9              &  & 5.3  & 3.0                                                          & 1.7               &  & 1.9  & 1.1                                                          & 0.6               &  & 9.60                                                         & 10.53             \\
		240 &  & 61.3 & 77.1                                                         & 71.7              &  & 5.5  & 0.8                                                          & 1.1               &  & 2.0  & 0.3                                                          & 0.4               &  & 10.19                                                        & 10.12             \\
		245 &  & 61.2 & 77.1                                                         & 72.2              &  & 5.4  & 2.8                                                          & 1.6               &  & 1.9  & 1.0                                                          & 0.6               &  & 9.89                                                         & 10.66             \\
		250 &  & 61.2 & 77.2                                                         & 72.0              &  & 5.4  & 3.3                                                          & 1.9               &  & 1.9  & 1.2                                                          & 0.7               &  & 9.37                                                         & 10.35             \\ \hline
	\end{tabular}
\end{spacing}
\end{table}
\end{appendices}
\end{document}


%%%%%%%%%%%%%%%%%
